# Supplementary material for: Novel red blood cell shaped α-Fe2O3 microstructures and FeO(OH) nanorods as high capacity supercapacitors
Source: Royal Society of Chemistry journal article supplement (doi:10.1039/c5ra14619d), 2015-01-01
Supplement: c5ra14619d1.pdf [file c5ra14619d1.pdf]

## Electronic Supplementary Information (ESI)

### Novel red blood cell shape $\alpha$ -Fe<sub>2</sub>O<sub>3</sub> microstructures and FeO(OH) nanorods as high capacity supercapacitors

Rongmei Liu,<sup>\*a</sup> Zixiang Jiang,<sup>a</sup> Qi Liu,<sup>b</sup> Xiandong Zhu,<sup>a</sup> Li Liu,<sup>a</sup> Lu Ni<sup>a</sup> and Chengcheng Shen<sup>a</sup>

<sup>a</sup> College of Biological and Chemical Engineering, Anhui Polytechnic University, Wuhu Anhui 241000, P. R. China,

Fax: +86 553 2871 255; Tel: +86 553 2871 255

E-mail: [liurongmei@ahpu.edu.cn](mailto:liurongmei@ahpu.edu.cn)

<sup>b</sup> College of Materials Science and Engineering, Anhui Polytechnic University, Wuhu, Anhui 241000, P. R. China.

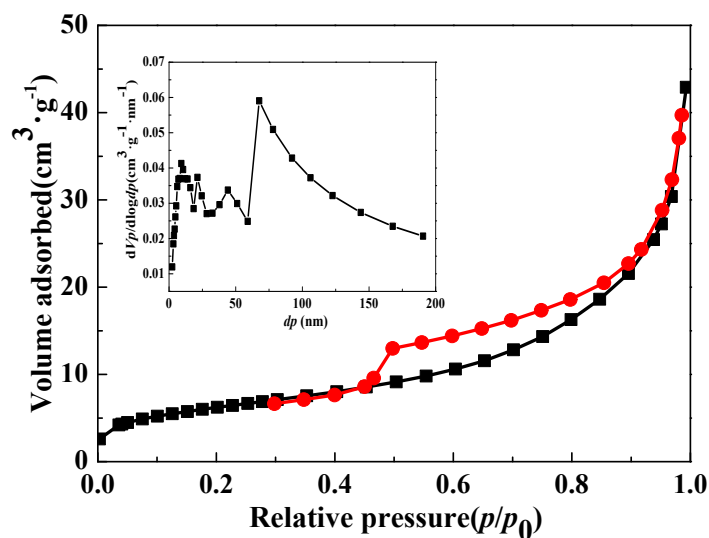

Fig. S1 Nitrogen adsorption–desorption isotherms of the as-prepared  $\alpha$ -Fe<sub>2</sub>O<sub>3</sub> microspheres. Inset: the pore size distribution.

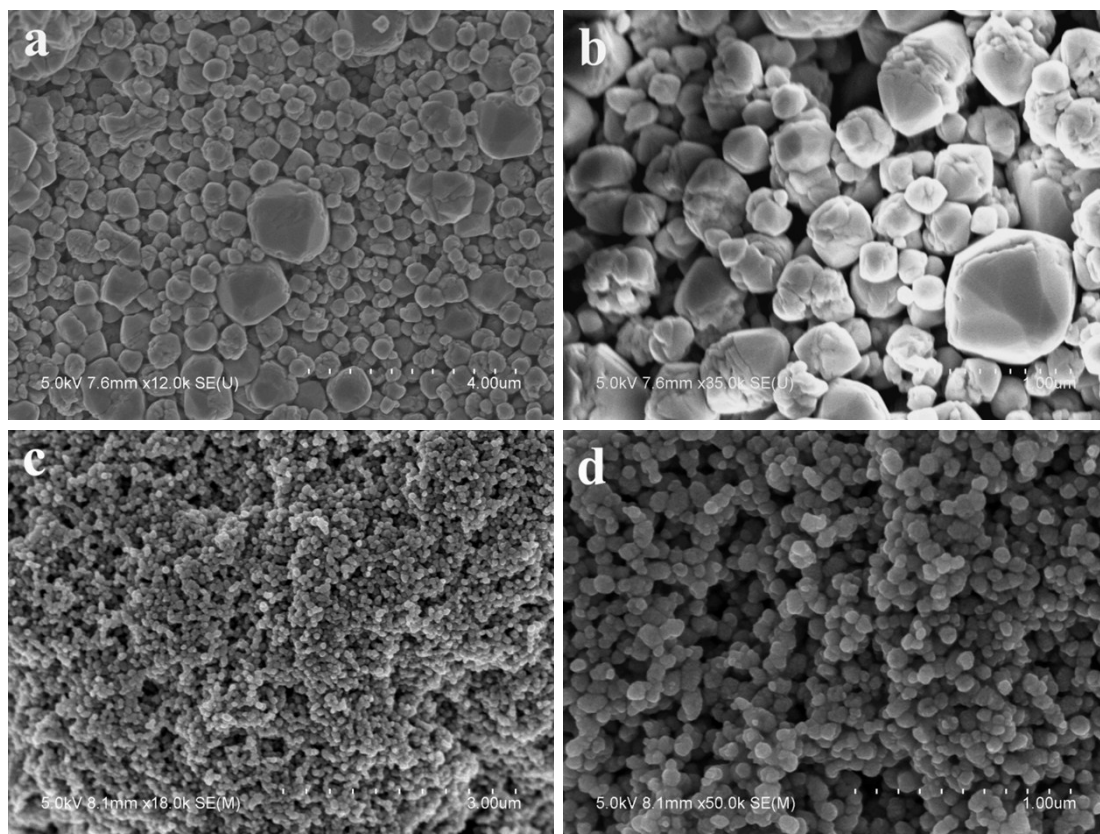

**Fig. S2** SEM images of the sample prepared without the addition of (a, b) PVA and (c, d)  $\text{NH}_4\text{Cl}$ .

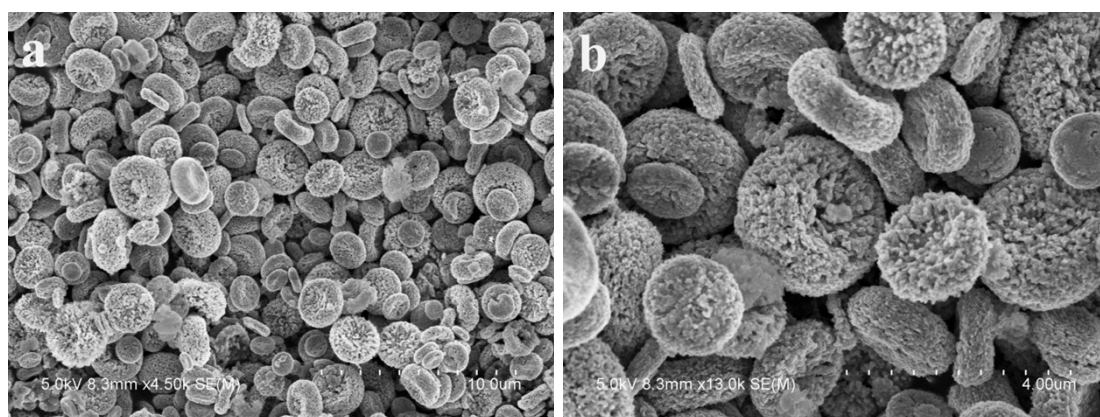

**Fig. S3** SEM images of the sample prepared at 180 °C.

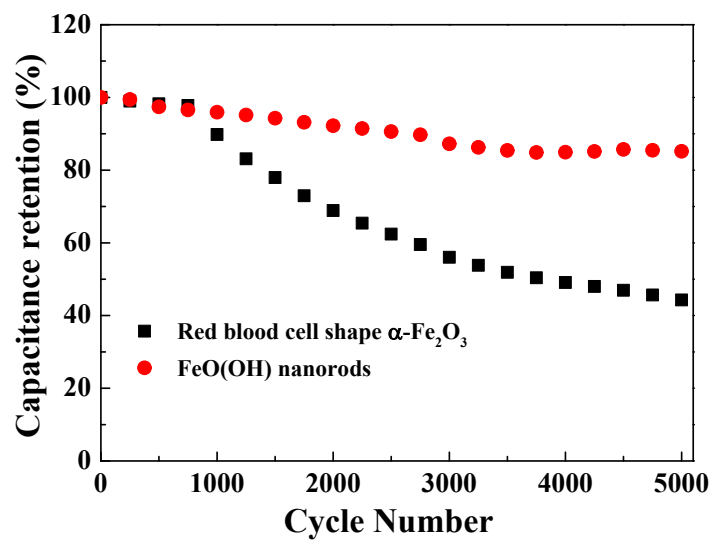

**Fig. S4** Cycle performance of the samples measured at a scan rate of  $50\text{mV}\cdot\text{s}^{-1}$  for 5,000 cycles.
